# Supplementary material for: Prospective diagnostic accuracy study of plasma soluble ST2 for diagnosis of acute aortic syndromes
Source: PubMed Central journal article supplement (PMC7033105; doi:10.1038/s41598-020-59884-6), 2020-02-20
Supplement: 41598_2020_59884_MOESM1_ESM.pdf [file 41598_2020_59884_MOESM1_ESM.pdf]

# **Prospective diagnostic accuracy study of plasma soluble ST2 for diagnosis of acute aortic syndromes**

Fulvio Morello M.D. Ph.D.<sup>1,2</sup>, Alice Bartalucci M.D.<sup>1</sup>, Marco Bironzo M.D.<sup>1</sup>, Marco Santoro M.S.<sup>1</sup>, Emanuele Pivetta M.D. Ph.D.<sup>1</sup>, Alice Ianniello B.D.<sup>3</sup>, Francesca Rumbolo B.D.<sup>3</sup>, Giulio Mengozzi M.D. Ph.D.<sup>3</sup>, Enrico Lupia M.D. Ph.D.<sup>1,2</sup>

1. S.C.U. Medicina d'Urgenza, Molinette Hospital, A.O.U. Città della Salute e della Scienza, Torino, Italy. 2. Dipartimento di Scienze Mediche, Università degli Studi di Torino, Torino, Italy. 3. S.C. Biochimica Clinica, A.O.U. Città della Salute e della Scienza, Torino, Italy.

***SUPPLEMENTARY MATERIAL***

Supplementary figure 1.

**a**

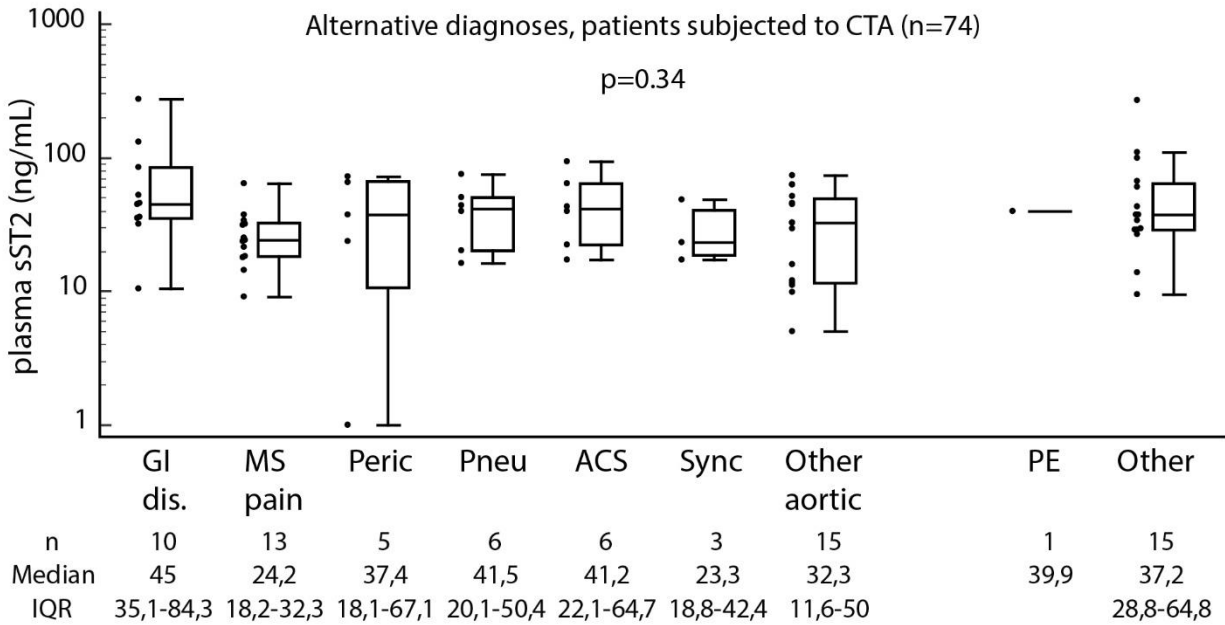

**b**

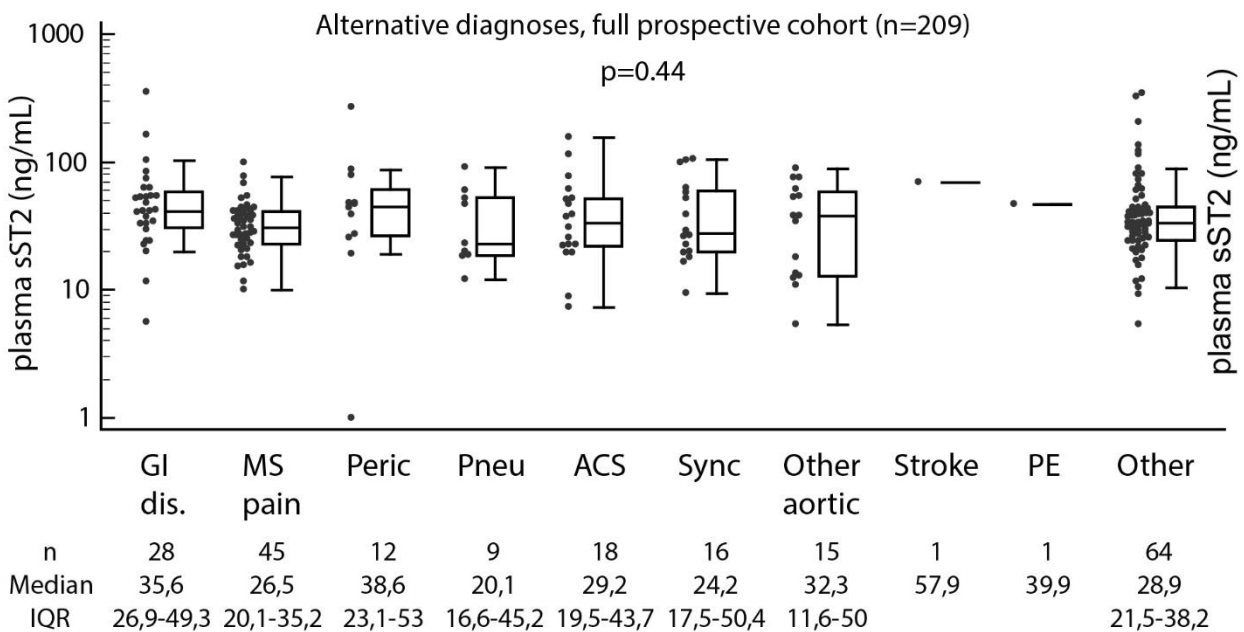

*Figure legend.* Dot-plot and box-whisker representation of plasma sST2 levels in study patients with alternative diagnoses. **(a)** Patients subjected to CTA. **(b)** Patient adjudication based on diagnostic outcome (full cohort). ACS: acute coronary syndrome; GI dis: gastro-intestinal disease; MS: muscle-skeletal; Other aortic: other aortic diseases; PE: pulmonary embolism; Peric: pericarditis; Pneu: pleurisy/pneumonia; Sync: non AAS-related syncope.

**Supplementary table 1.** Demographic and clinical characteristics of study patients subjected to computed tomography angiography.

| <b>Variable</b>                                      | <b>Total patients</b><br>(n=162) | <b>AASs</b><br>(n=88) | <b>AltD</b><br>(n=74) | <b>P-value</b> |
|------------------------------------------------------|----------------------------------|-----------------------|-----------------------|----------------|
| Female gender                                        | 49 (30.2%)                       | 26 (29.5%)            | 23 (31.1%)            | 0.83           |
| Age [y]                                              | 71 (59-79)                       | 72 (59.5-80)          | 69 (58-79)            | 0.51           |
| Hypertension                                         | 105 (64.8%)                      | 62 (70.5%)            | 43 (58.1%)            | 0.1            |
| Diabetes                                             | 12 (7.4%)                        | 7 (8%)                | 5 (6.8%)              | 0.77           |
| Dyslipidemia                                         | 8 (4.9%)                         | 3 (3.4%)              | 5 (6.8%)              | 0.33           |
| Smoking                                              | 46 (28.4%)                       | 26 (29.5%)            | 20 (27%)              | 0.72           |
| Drug use                                             | 2 (1.2%)                         | 2 (2.3%)              | 0 (0%)                | 0.19           |
| Coronary art. dis.                                   | 17 (10.5%)                       | 6 (6.8%)              | 11 (14.9%)            | 0.1            |
| Active cancer                                        | 1 (0.6%)                         | 0 (0%)                | 1 (1.4%)              | 0.27           |
| Periph. art. dis.                                    | 0 (0%)                           | 0 (0%)                | 0 (0%)                | -              |
| Abdominal aortic an.                                 | 14 (8.6%)                        | 5 (5.7%)              | 9 (12.2%)             | 0.14           |
| Previous AAS                                         | 10 (6.2%)                        | 4 (4.5%)              | 6 (8.1%)              | 0.35           |
| Systolic BP [mmHg]                                   | 140 (120-160)                    | 140 (110-170)         | 145 (125-160)         | 0.72           |
| Diastolic BP [mmHg]                                  | 80 (70-90)                       | 80 (60-95)            | 80 (74-90)            | 0.09           |
| Heart rate [bpm]                                     | 74 (67-85)                       | 72 (64-83)            | 75 (69-90)            | 0.25           |
| Time from onset [h]                                  | 4 (2-9)                          | 3 (2-6)               | 6 (3-14)              | <0.001         |
| WBC count [ $\times 10^3/\mu\text{L}$ ] <sup>A</sup> | 9.97 (7.68-12.78)                | 11.66 (9.1-14.35)     | 8.7 (6.84-10.85)      | <0.001         |
| Creatinine [mg/dL] <sup>B</sup>                      | 1.01 (0.83-1.2)                  | 1.06 (0.86-1.21)      | 0.96 (0.82-1.15)      | 0.11           |
| Troponin T [ng/mL] <sup>C</sup>                      | 15 (9-33)                        | 20 (10-41)            | 11.5 (7.5-19)         | 0.005          |
| D-dimer [ng/mL] <sup>D</sup>                         | 1840 (780-8600)                  | 6301 (1813-28646)     | 1013.5 (340-1706)     | <0.001         |

<sup>A</sup>n=160; <sup>B</sup>n=159; <sup>C</sup>n=139; <sup>D</sup>n=133. Categorical variables are presented as n (%) and continuous variables as median (25<sup>th</sup>-75<sup>th</sup> percentile). AAS= acute aortic syndrome; AltD: alternative diagnoses; an.=aneurysm; art.= artery; BP= blood pressure; dis.= disease; sy.= syndrome; thor.= thoracic.
